# Supplementary material for: The Hemophilia Joint Health Score version 2.1 Validation in Adult Patients Study: A multicenter international study
Source: PubMed Central journal article supplement — Res Pract Thromb Haemost. 2022 Mar 25;6(2):e12690. doi: 10.1002/rth2.12690 (PMC8956786; doi:10.1002/rth2.12690), 2022-03-25
Supplement: RTH2-6-e12690-s003.pdf [file RTH2-6-e12690-s003.pdf]

**Supplement**

**S1 - Descriptive statistics for the HJHS and Outcome Measure variables in the hemophilia cohort**

|                                     | HJHS Total Score |         |         |      | WFH Total Score |         |         |      | Fish Total Score |         |         |      | HAL Total Score |         |         |       |
|-------------------------------------|------------------|---------|---------|------|-----------------|---------|---------|------|------------------|---------|---------|------|-----------------|---------|---------|-------|
|                                     | 18 - 29          | 30 - 40 | 41 - 50 | > 50 | 18 - 29         | 30 - 40 | 41 - 50 | > 50 | 18 - 29          | 30 - 40 | 41 - 50 | > 50 | 18 - 29         | 30 - 40 | 41 - 50 | > 50  |
| <b>Valid</b>                        | 65               | 51      | 26      | 50   | 65              | 51      | 26      | 50   | 65               | 51      | 26      | 49   | 57              | 39      | 23      | 44    |
| <b>Missing</b>                      | 0                | 0       | 0       | 0    | 0               | 0       | 0       | 0    | 0                | 0       | 0       | 1    | 8               | 12      | 3       | 6     |
| <b>Mean</b>                         | 16.2             | 24.6    | 34.5    | 35.9 | 10.8            | 14.9    | 20.1    | 21.2 | 29.3             | 26.3    | 24.8    | 24.0 | 89.7            | 82.2    | 65.9    | 62.6  |
| <b>Std. Deviation</b>               | 17.5             | 17.9    | 17.5    | 20.0 | 9.9             | 11.1    | 10.7    | 10.6 | 4.4              | 5.4     | 5.2     | 5.2  | 14.4            | 20.9    | 22.2    | 25.0  |
| <b>Minimum</b>                      | 0                | 0       | 0       | 0    | 0               | 0       | 4       | 1    | 15               | 16      | 14      | 15   | 33.2            | 25.4    | 15.5    | 10.5  |
| <b>Maximum</b>                      | 63               | 71      | 69      | 74   | 45              | 45      | 38      | 43   | 32               | 32      | 32      | 32   | 100             | 100     | 100     | 100   |
| <b>0th percentile</b>               | 0.0              | 0.0     | 0.0     | 0.0  | 0.0             | 0.0     | 4.0     | 1.0  | 15.0             | 16.0    | 14.0    | 15.0 | 33.2            | 25.4    | 15.5    | 10.5  |
| <b>2.5<sup>th</sup> percentile</b>  | 0.0              | 0.0     | 6.3     | 4.5  | 0.0             | 0.0     | 4.0     | 2.5  | 17.6             | 16.0    | 14.6    | 15.0 | 46.2            | 41.3    | 19.3    | 15.3  |
| <b>5<sup>th</sup> percentile</b>    | 0.0              | 0.0     | 10.5    | 6.0  | 1.2             | 0.0     | 4.3     | 5.4  | 20.0             | 16.5    | 15.3    | 15.0 | 64.7            | 42.4    | 23.6    | 21.2  |
| <b>25<sup>th</sup> percentile</b>   | 2.0              | 8.0     | 20.5    | 17.0 | 4.0             | 4.0     | 12.0    | 13.0 | 28.0             | 22.0    | 22.3    | 20.0 | 86.2            | 66.0    | 56.6    | 49.5  |
| <b>50<sup>th</sup> percentile</b>   | 9.0              | 27.0    | 36.0    | 37.0 | 7.0             | 16.0    | 18.5    | 21.0 | 32.0             | 28.0    | 26.0    | 24.0 | 94.3            | 93.1    | 72.2    | 62.7  |
| <b>75<sup>th</sup> percentile</b>   | 21.0             | 38.0    | 48.0    | 50.8 | 15.0            | 22.0    | 29.5    | 27.8 | 32.0             | 31.5    | 28.8    | 28.0 | 100.0           | 100.0   | 76.7    | 83.2  |
| <b>95<sup>th</sup> percentile</b>   | 52.6             | 51.0    | 55.8    | 68.2 | 31.6            | 32.5    | 36.5    | 38.6 | 32.0             | 32.0    | 31.8    | 32.0 | 100.0           | 100.0   | 98.2    | 98.9  |
| <b>97.5<sup>th</sup> percentile</b> | 60.2             | 57.5    | 60.9    | 70.8 | 35.4            | 34.8    | 37.4    | 39.8 | 32.0             | 32.0    | 32.0    | 32.0 | 100.0           | 100.0   | 99.5    | 100.0 |

HJHS = Hemophilia Joint Health Score  
 WFH = World Federation of Hemophilia Gilbert Score  
 FISH = Functional Independence Score in Hemophilia  
 HAL = Hemophilia Activities List

|                                     | Sensory PR Score* |         |         |      | Affective PRI Score* |         |         |      | SF-MPQ vas scale* |         |         |      | PPI Score* |         |         |      |
|-------------------------------------|-------------------|---------|---------|------|----------------------|---------|---------|------|-------------------|---------|---------|------|------------|---------|---------|------|
|                                     | 18 - 29           | 30 - 40 | 41 - 50 | > 50 | 18 - 29              | 30 - 40 | 41 - 50 | > 50 | 18 - 29           | 30 - 40 | 41 - 50 | > 50 | 18 - 29    | 30 - 40 | 41 - 50 | > 50 |
| <b>Valid</b>                        | 65                | 51      | 26      | 50   | 65                   | 51      | 26      | 50   | 65                | 51      | 26      | 50   | 65         | 43      | 24      | 47   |
| <b>Missing</b>                      | 0                 | 0       | 0       | 0    | 0                    | 0       | 0       | 0    | 0                 | 0       | 0       | 0    | 0          | 8       | 2       | 3    |
| <b>Mean</b>                         | 2.7               | 5.0     | 8.5     | 7.8  | 0.8                  | 1.2     | 2.3     | 2.0  | 13.7              | 23.5    | 37.3    | 35.4 | 0.6        | 0.9     | 1.3     | 1.1  |
| <b>Std. Deviation</b>               | 3.2               | 6.0     | 7.5     | 6.3  | 1.2                  | 1.9     | 3.2     | 2.7  | 19.3              | 22.3    | 27.6    | 29.5 | 0.8        | 0.8     | 1.1     | 1.0  |
| <b>Minimum</b>                      | 0                 | 0       | 0       | 0    | 0                    | 0       | 0       | 0    | 0                 | 0       | 0       | 0    | 0          | 0       | 0       | 0    |
| <b>Maximum</b>                      | 17                | 21      | 28      | 25   | 5                    | 8       | 11      | 12   | 84                | 74      | 95      | 98   | 3          | 3       | 4       | 3    |
| <b>0th percentile</b>               | 0.0               | 0.0     | 0.0     | 0.0  | 0.0                  | 0.0     | 0.0     | 0.0  | 0.0               | 0.0     | 0.0     | 0.0  | 0.0        | 0.0     | 0.0     | 0.0  |
| <b>2.5<sup>th</sup> percentile</b>  | 0.0               | 0.0     | 0.0     | 0.0  | 0.0                  | 0.0     | 0.0     | 0.0  | 0.0               | 0.0     | 1.3     | 0.0  | 0.0        | 0.0     | 0.0     | 0.0  |
| <b>5<sup>th</sup> percentile</b>    | 0.0               | 0.0     | 0.0     | 0.0  | 0.0                  | 0.0     | 0.0     | 0.0  | 0.0               | 0.0     | 2.3     | 0.0  | 0.0        | 0.0     | 0.0     | 0.0  |
| <b>25<sup>th</sup> percentile</b>   | 0.0               | 1.0     | 3.0     | 2.3  | 0.0                  | 0.0     | 0.0     | 0.0  | 0.0               | 3.0     | 17.0    | 9.5  | 0.0        | 0.0     | 0.0     | 0.0  |
| <b>50<sup>th</sup> percentile</b>   | 2.0               | 2.0     | 5.5     | 6.0  | 0.0                  | 0.0     | 0.5     | 1.0  | 6.0               | 17.0    | 33.0    | 28.5 | 0.0        | 1.0     | 1.0     | 1.0  |
| <b>75<sup>th</sup> percentile</b>   | 4.0               | 7.0     | 13.5    | 11.0 | 1.0                  | 2.0     | 3.0     | 3.0  | 16.0              | 44.0    | 58.0    | 59.0 | 1.0        | 1.0     | 2.0     | 2.0  |
| <b>95<sup>th</sup> percentile</b>   | 8.6               | 20.0    | 22.3    | 20.7 | 2.8                  | 5.0     | 8.8     | 8.1  | 56.0              | 62.5    | 84.5    | 87.2 | 2.0        | 2.0     | 3.0     | 3.0  |
| <b>97.5<sup>th</sup> percentile</b> | 10.4              | 20.8    | 24.9    | 22.0 | 4.4                  | 5.8     | 9.8     | 9.0  | 65.0              | 66.0    | 90.6    | 90.6 | 2.4        | 3.0     | 3.4     | 3.0  |

\*SF-MPQ = Short form McGill Pain Questionnaire

PRI = Pain Rating Index

PPI = Present Pain Intensity

Confidential  
To be submitted
